# Supplementary material for: Structure and design of Langya virus glycoprotein antigens
Source: PubMed Central journal article supplement (PMC10462157; doi:10.1101/2023.08.20.554025), 2023-08-26
Supplement: NIHPP2023.08.20.554025v2-supplement-1.pdf [file NIHPP2023.08.20.554025v2-supplement-1.pdf]

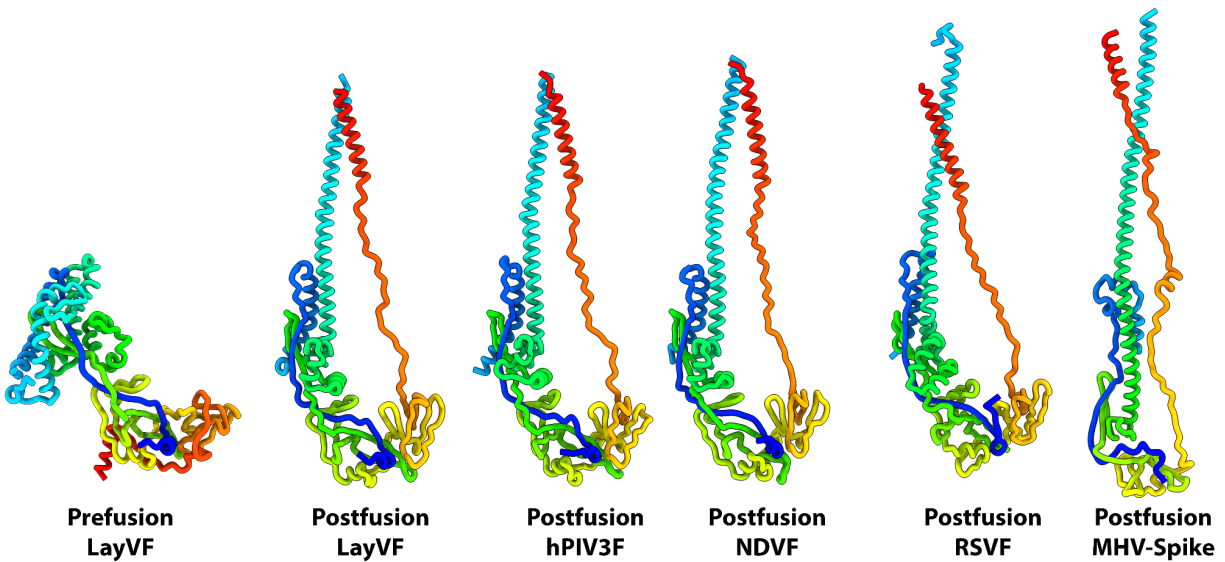

**Figure S3 Conservation of the general architecture of paramyxovirus and coronavirus fusion proteins.**

Ribbon diagrams of viral class I fusion proteins underscoring the architectural conservation among paramyxovirus and coronavirus postfusion structures. All models are colored using a rainbow scheme from blue (N-terminus) to red (C-terminus). The structures rendered are hPIV3 F: PDB 1ZTM; NDV F: PDB 3MAW; RSV F (PDB 3RRR); MHV S (PDB 6B3O).

**Extended Data video 1.** 3DFlex cryoEM density series oscillating between 41 frames showing movement of the LayV G stalk.
